# Supplementary material
Source: Springer Nature journal article supplement (https://www.springermedizin.de/resource/supplementary/13058_2013_3456_MOESM2_ESM.pdf/9704078)
Supplement: MOESM2 [file 9704078]

**Supplementary Table 6: Primers used for sequencing *SEC63* and *FOXO3* genes.**

| <b>Name</b>   | <b>Size</b> | <b>Sequence</b>              |
|---------------|-------------|------------------------------|
| SEC63_Left_1  | 19          | 5'-agtcagagcgtggcgtg_3'      |
| SEC63_Right_1 | 21          | 5'-ggatcaaattcagaagctcca-3'  |
| SEC63_Left_2  | 22          | 5'-cccgaaataggatgaaacg-3'    |
| SEC63_Right_2 | 20          | 5'-tcttctgttgccatcctct-3'    |
| SEC63_Left_3  | 22          | 5'-cgtcacactctactcactcc-3'   |
| SEC63_Right_3 | 22          | 5'-caaatatgtgcaaacactgtgg-3' |
| FOXO3_Left_1  | 20          | 5'-gtccctgaaggaaggaagc-3'    |
| FOXO3_Right_1 | 20          | 5'-ctgtcgccttatectttaa-3'    |
| FOXO3_Left_2  | 20          | 5'-acaacggctcactctgtcc-3'    |
| FOXO3_Right_2 | 20          | 5'-tagagctccgctgcatgagt-3'   |
| FOXO3_Left_3  | 20          | 5'-atatggcaggcaccatgaat-3'   |
| FOXO3_Right_3 | 20          | 5'-agtttgagggtctgctttgc-3'   |
